# Supplementary material
Source: PubMed Central journal article supplement (PMC5312455)
Supplement: Supp_Fig2.pdf [file Supp_Fig2.pdf]

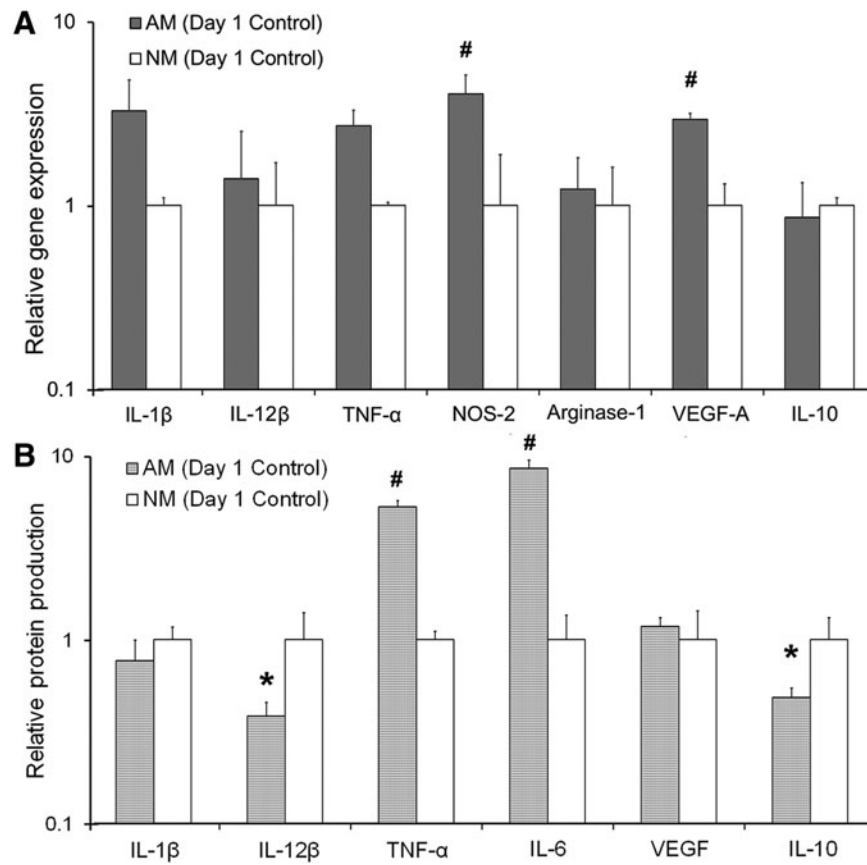

**SUPPLEMENTARY FIG. S2.** (A) Relative gene expression by NMs and AMs 24 h postencapsulation but before coculture with chondrocytes. RPL-32 served as the reference gene, and the data are normalized to the NM group. (B) Relative protein expression by NMs and AMs at the time of encapsulation as assessed by a multiplex kit. Data are normalized to the DNA content in each sample and further normalized to the NM group. Significant differences between the AM and NM groups are indicated either by an *asterisk* ( $p < 0.05$ ) or a *pound symbol* ( $p < 0.01$ ). AM, activated macrophage; NM, normal macrophage.
