# Supplementary material
Source: PubMed Central journal article supplement (PMC5312455)
Supplement: Supp_Fig3.pdf [file Supp_Fig3.pdf]

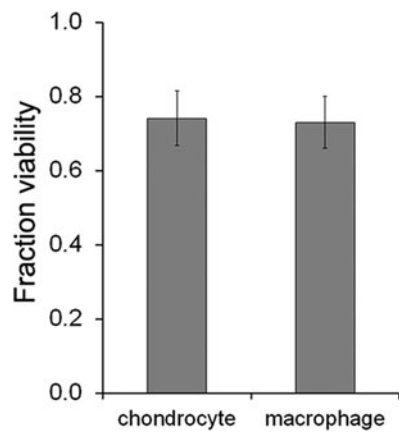

**SUPPLEMENTARY FIG. S3.** Chondrocyte and macrophage viability in PEGDA hydrogels following 7 and 3 days of culture, respectively. PEGDA, poly(ethylene glycol) diacrylate.
